# Supplementary material for: Scratch-resistant sol–gel coatings on pristine polycarbonate
Source: Royal Society of Chemistry journal article supplement (doi:10.1039/c5nj00426h), 2015-01-01
Supplement: c5nj00426h1.pdf [file c5nj00426h1.pdf]

ARTICLE

## Scratch resistant sol-gel coatings on pristine polycarbonate

Nicolas Le Bail,<sup>a,b</sup> Krystelle Lioni,<sup>c\*</sup> Stéphane Benayoun,<sup>a</sup> Sophie Pavan,<sup>a</sup> Leslie Thompson<sup>c</sup>, Christel Gervais,<sup>d</sup> Géraud Dubois<sup>c</sup>, Bérangère Toury<sup>b\*</sup>

### Supporting Information

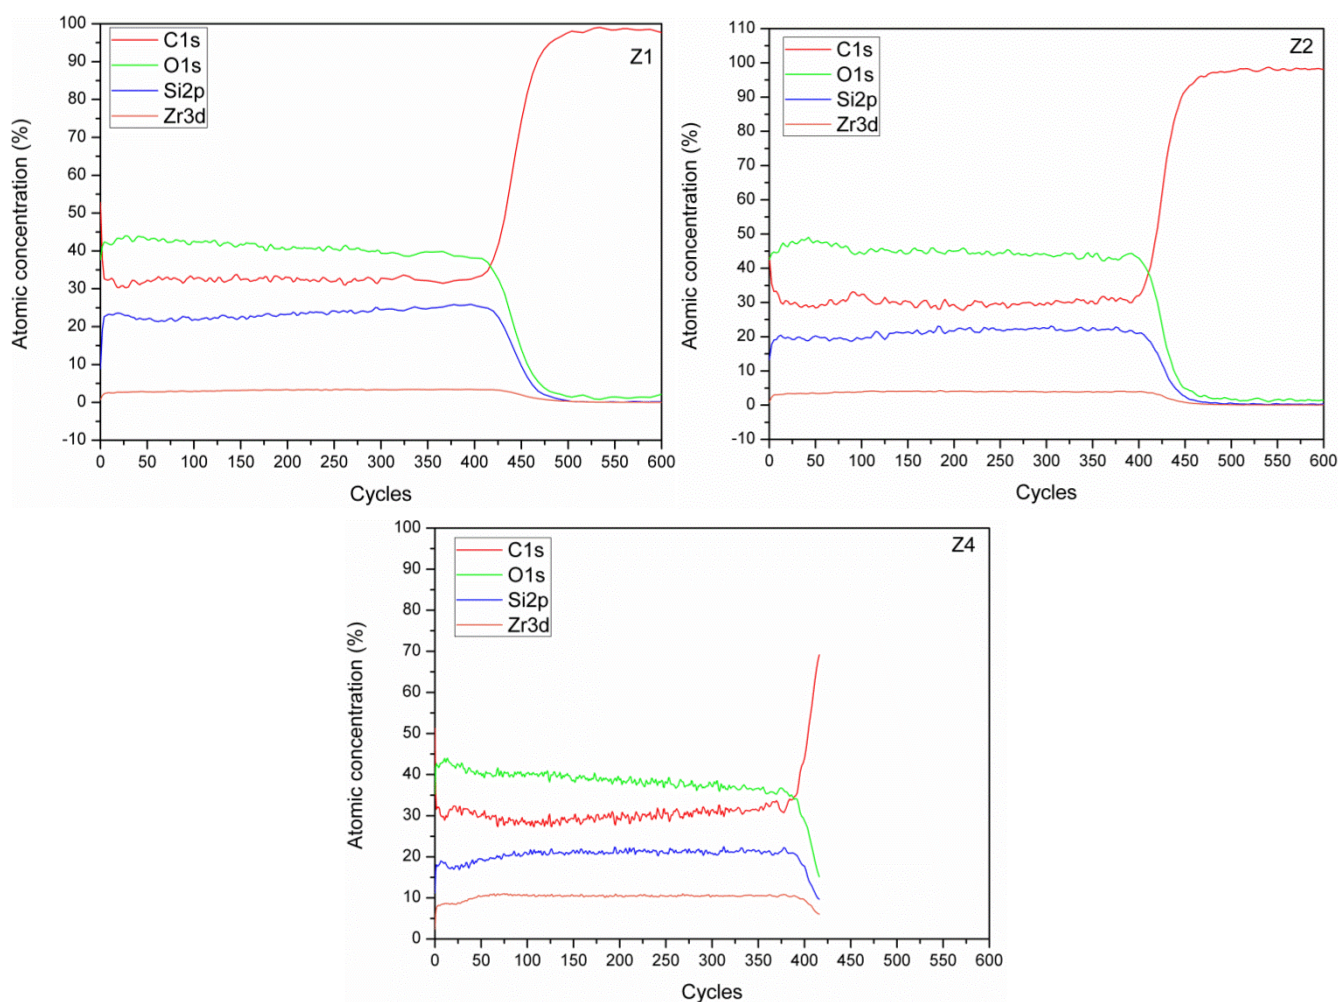

Fig S11 XPS profiles on PC-Z1, PC-Z2 and PC-Z4

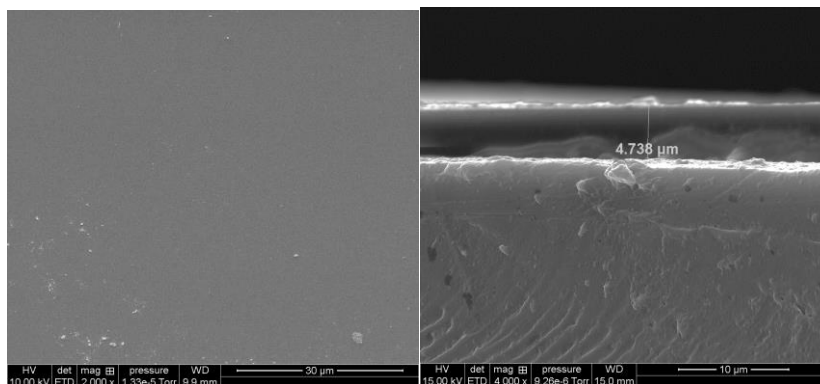

**Fig S12:** SEM images recorded on PC-Z4 sample, (a) surface and (b) cross section
